# Supplementary material for: SOX2 activation predicts prognosis in patients with head and neck squamous cell carcinoma
Source: PubMed Central journal article supplement (PMC5785960; doi:10.1038/s41598-018-20086-w), 2018-01-26
Supplement: 41598_2018_20086_MOESM1_ESM.pdf [file 41598_2018_20086_MOESM1_ESM.pdf]

SOX2 activation predicts prognosis in patients with head and neck squamous cell carcinoma

Ji Hyun Chung<sup>1</sup>, Hae Rim Jung<sup>1</sup>, Ah Ra Jung<sup>1</sup>, Young Chan Lee<sup>1</sup>, Moonkyoo Kong<sup>2</sup>, Ju-Seog Lee<sup>3</sup>,  
Young-Gyu Eun<sup>1,\*</sup>

<sup>1</sup>Department of Otolaryngology-Head and Neck Surgery, School of Medicine, Kyung Hee University

<sup>2</sup>Department of Radiation Oncology, School of Medicine, Kyung Hee University

<sup>3</sup>Department of Systems Biology, The University of Texas MD Anderson Cancer Center, Houston,  
Texas

## Supplementary Figure Legends

Supplementary Fig. 1. SOX2 activation in HNSCC. (A) Cross-cancer summary of SOX2 alteration in 18 cancers using genome copy number data obtained from the TCGA cohort. HNSCC is the fourth cancer to have SOX2 amplification (21%). (B) Scatter plots of SOX2 mRNA expression and copy number alteration in patients in the TCGA cohort. SOX2 expression was substantially higher in samples lacking SOX2 amplification.

Supplementary Fig. 2. Association between SOX2 signature and other subtypes of HNSCC. Patients are shown in columns and are grouped according to SOX2 signature, tumour site, human papillomavirus (HPV) status, regional lymph node (LN) metastasis, T stage, and smoking status.

Supplementary Fig. 3. Frequency of molecular subtype between SOX2-high and SOX2-low subgroups.

Supplementary Fig. 4. Kaplan-Meier plots of overall survival (OS) of patients with HNSCC according to SOX2 mRNA expression in the TCGA cohort.

A

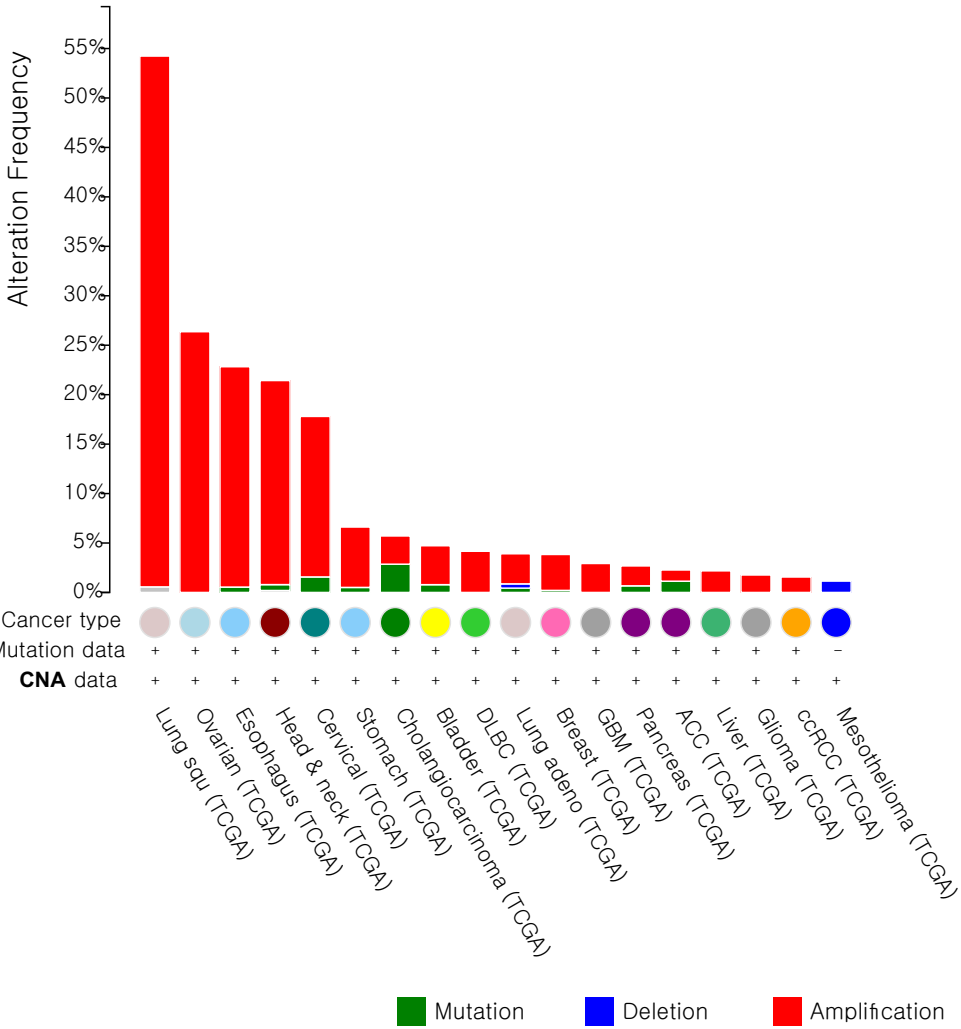

B

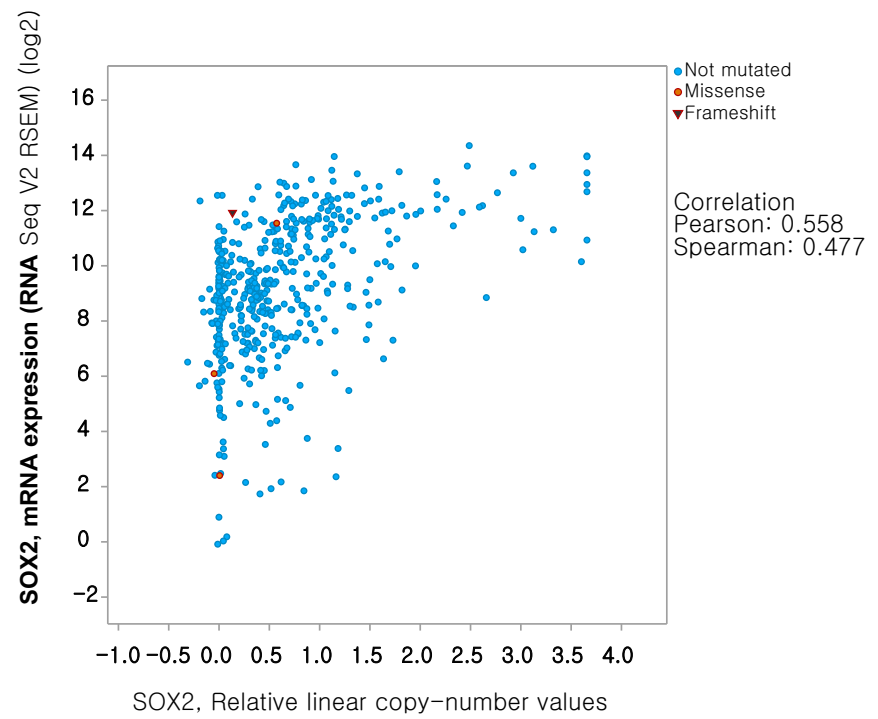

Suppl. Figure 1

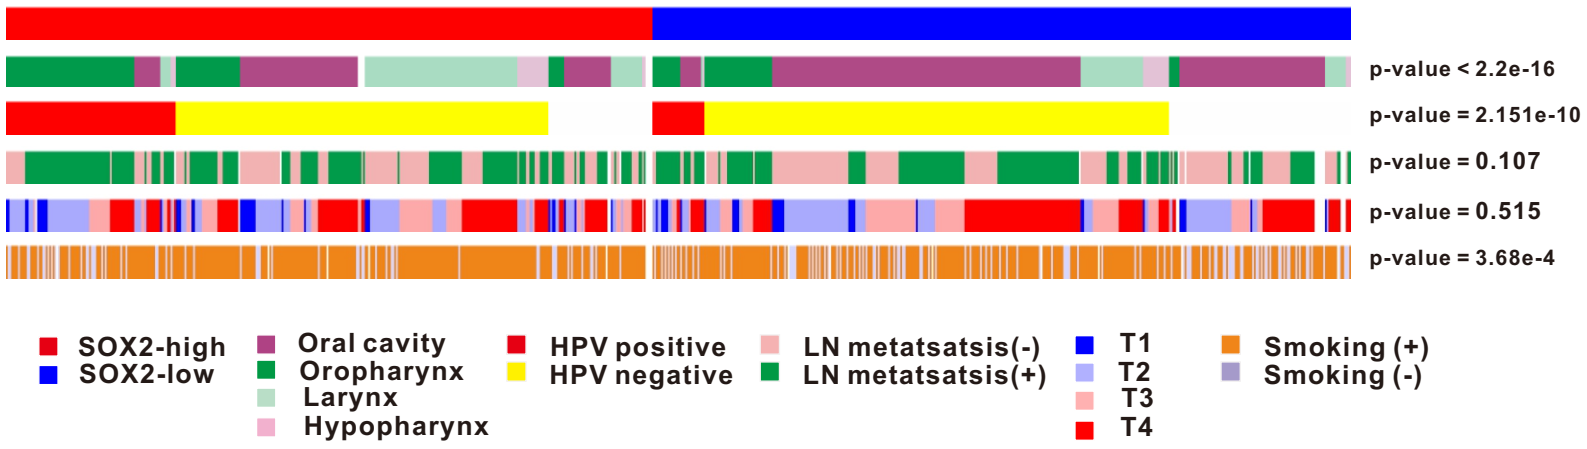

Suppl. Figure 2

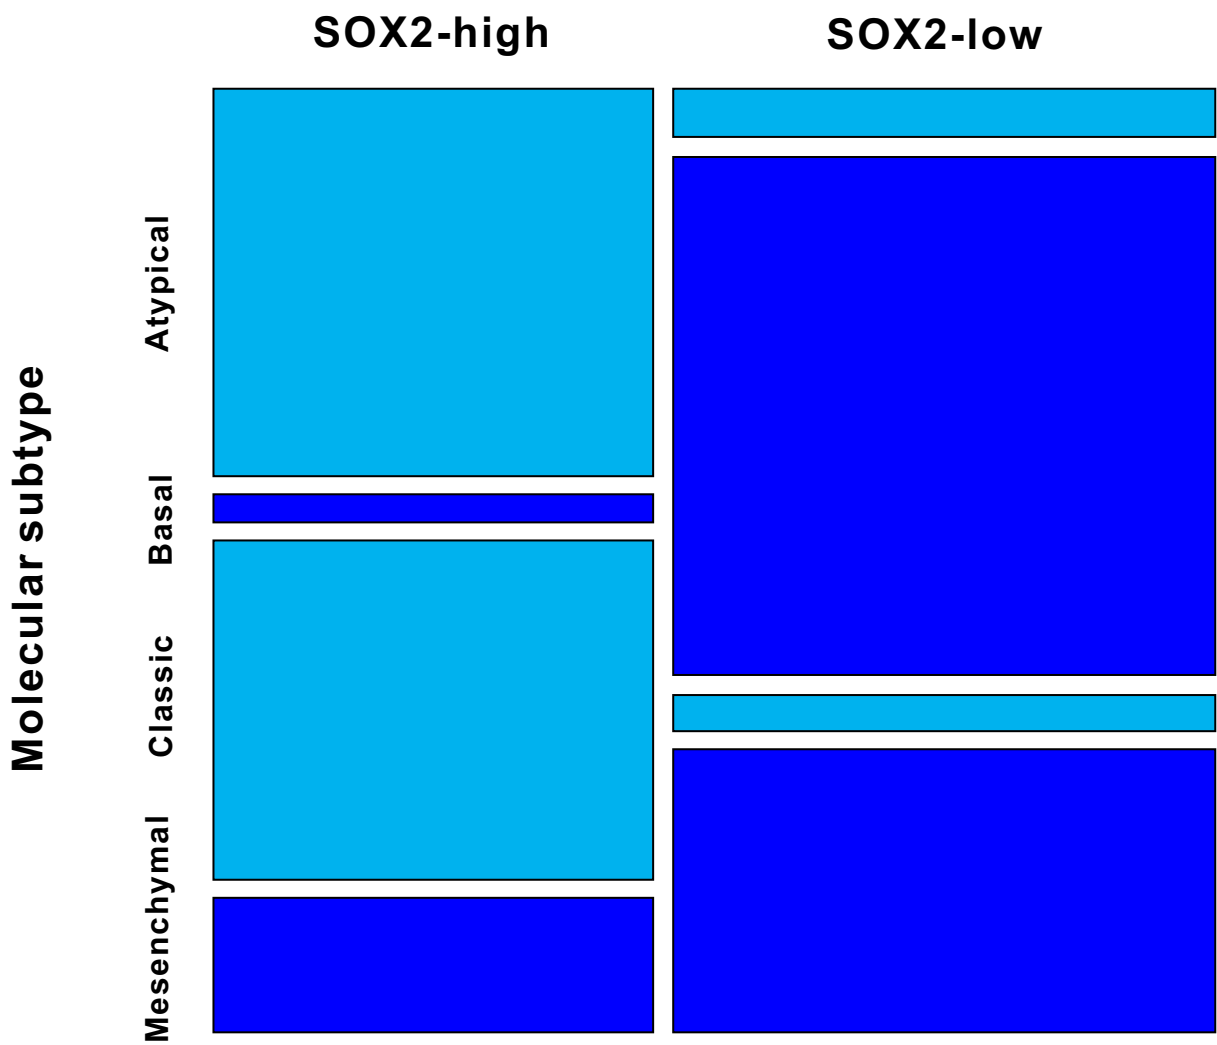

Suppl. Figure 3

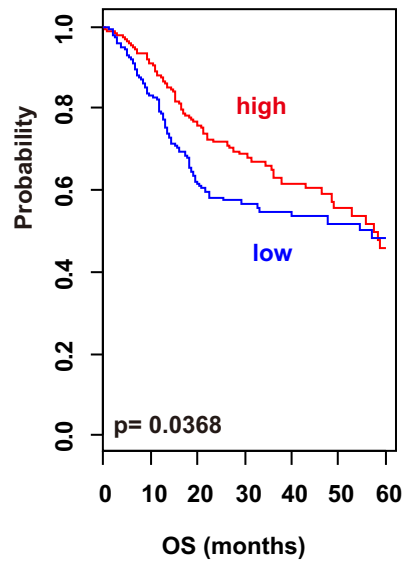

Suppl. Figure 4

Table S1. Genes associated with SOX2

| <b>TCGA RNA sequencing gene symbol</b> | <b>correlation coefficient with copy number of SOX2</b> | <b>p value of correlation with copy number of SOX2</b> | <b>correlation coefficient with gene expression of SOX2</b> | <b>p value of correlation with gene expression of SOX2</b> |
|----------------------------------------|---------------------------------------------------------|--------------------------------------------------------|-------------------------------------------------------------|------------------------------------------------------------|
| ABCC5                                  | 0.678                                                   | 1.92523E-70                                            | 0.651                                                       | 4.16604E-63                                                |
| ACAP2                                  | 0.506                                                   | 9.78107E-35                                            | 0.603                                                       | 4.68376E-52                                                |
| ACPL2                                  | 0.421                                                   | 1.98927E-23                                            | 0.490                                                       | 2.42246E-32                                                |
| ACTL6A                                 | 0.738                                                   | 1.74965E-89                                            | 0.471                                                       | 1.00055E-29                                                |
| ADRA2B                                 | 0.437                                                   | 2.24913E-25                                            | 0.425                                                       | 6.86321E-24                                                |
| B4GALT4                                | 0.437                                                   | 2.39056E-25                                            | 0.529                                                       | 2.56486E-38                                                |
| BEX2                                   | 0.447                                                   | 1.43944E-26                                            | 0.428                                                       | 2.70066E-24                                                |
| C3orf21                                | 0.624                                                   | 7.53622E-57                                            | 0.449                                                       | 9.04895E-27                                                |
| C3orf58                                | 0.515                                                   | 4.20488E-36                                            | 0.684                                                       | 6.02487E-72                                                |
| C6orf168                               | 0.427                                                   | 3.45506E-24                                            | 0.543                                                       | 1.10478E-40                                                |
| CACNA1B                                | 0.446                                                   | 2.13629E-26                                            | 0.506                                                       | 8.68839E-35                                                |
| CASP4                                  | -0.413                                                  | 1.63262E-22                                            | -0.460                                                      | 2.90495E-28                                                |
| CEP70                                  | 0.449                                                   | 8.2918E-27                                             | 0.521                                                       | 5.32347E-37                                                |
| CHST7                                  | 0.481                                                   | 4.92114E-31                                            | 0.541                                                       | 2.06789E-40                                                |
| CLCN2                                  | 0.592                                                   | 6.61921E-50                                            | 0.446                                                       | 1.79782E-26                                                |
| COCH                                   | 0.448                                                   | 1.15867E-26                                            | 0.536                                                       | 1.80041E-39                                                |
| CYP26A1                                | 0.404                                                   | 1.28819E-21                                            | 0.601                                                       | 1.07556E-51                                                |
| DCUN1D1                                | 0.635                                                   | 2.30113E-59                                            | 0.406                                                       | 8.46315E-22                                                |
| DLG1                                   | 0.444                                                   | 3.33888E-26                                            | 0.467                                                       | 4.22562E-29                                                |
| DLX6AS                                 | 0.405                                                   | 1.0798E-21                                             | 0.511                                                       | 1.50998E-35                                                |
| DMRT3                                  | 0.405                                                   | 1.02043E-21                                            | 0.505                                                       | 1.23783E-34                                                |
| DVL3                                   | 0.725                                                   | 9.18162E-85                                            | 0.471                                                       | 1.05205E-29                                                |

|              |       |             |       |             |
|--------------|-------|-------------|-------|-------------|
| EIF4A2       | 0.499 | 1.0015E-33  | 0.423 | 1.02942E-23 |
| EPCAM        | 0.415 | 8.05554E-23 | 0.537 | 1.12848E-39 |
| FAM20B       | 0.434 | 5.36703E-25 | 0.427 | 4.14603E-24 |
| FEZF1        | 0.426 | 5.3949E-24  | 0.492 | 1.39564E-32 |
| GK5          | 0.412 | 2.02108E-22 | 0.446 | 1.81963E-26 |
| GLT25D2      | 0.405 | 1.00949E-21 | 0.473 | 6.44051E-30 |
| GPC3         | 0.404 | 1.41277E-21 | 0.472 | 6.70273E-30 |
| GPR160       | 0.410 | 2.97186E-22 | 0.534 | 3.26647E-39 |
| IFT80        | 0.503 | 3.13136E-34 | 0.422 | 1.32643E-23 |
| IQCB1        | 0.418 | 4.21866E-23 | 0.506 | 1.11136E-34 |
| KCNG3        | 0.428 | 2.91277E-24 | 0.514 | 6.0285E-36  |
| KCNMB2       | 0.519 | 8.42383E-37 | 0.492 | 1.29582E-32 |
| KCNMB3       | 0.631 | 2.39568E-58 | 0.441 | 7.58611E-26 |
| KLHL24       | 0.524 | 1.39499E-37 | 0.455 | 1.54491E-27 |
| LOC100130691 | 0.403 | 1.84918E-21 | 0.584 | 3.03542E-48 |
| LSG1         | 0.676 | 6.02408E-70 | 0.465 | 5.82863E-29 |
| MCCC1        | 0.686 | 1.03027E-72 | 0.607 | 5.70455E-53 |
| MED12L       | 0.473 | 4.90775E-30 | 0.472 | 6.96423E-30 |
| MRAP2        | 0.417 | 5.78204E-23 | 0.634 | 4.06282E-59 |
| MSL2         | 0.485 | 1.12818E-31 | 0.503 | 2.92887E-34 |
| MYNN         | 0.649 | 8.34691E-63 | 0.453 | 2.58657E-27 |
| NCRNA00086   | 0.433 | 7.74741E-25 | 0.551 | 4.92812E-42 |
| NMNAT3       | 0.410 | 2.95747E-22 | 0.520 | 5.88133E-37 |
| NTRK2        | 0.415 | 8.83634E-23 | 0.764 | 1.2542E-99  |
| NTS          | 0.424 | 7.56766E-24 | 0.619 | 1.0548E-55  |
| OPA1         | 0.575 | 1.37104E-46 | 0.401 | 2.92893E-21 |
| OR7A5        | 0.413 | 1.66114E-22 | 0.417 | 4.654E-23   |



|          |       |             |       |             |
|----------|-------|-------------|-------|-------------|
| PCCB     | 0.460 | 2.8295E-28  | 0.446 | 2.0147E-26  |
| PHC3     | 0.552 | 2.56483E-42 | 0.442 | 5.69698E-26 |
| PIR      | 0.405 | 1.20088E-21 | 0.593 | 5.22962E-50 |
| PNCK     | 0.437 | 2.44554E-25 | 0.439 | 1.30532E-25 |
| PRKCI    | 0.614 | 1.3106E-54  | 0.454 | 1.83606E-27 |
| RAB6B    | 0.488 | 5.16015E-32 | 0.431 | 1.17188E-24 |
| RASL11A  | 0.425 | 5.8441E-24  | 0.509 | 3.16502E-35 |
| RIMKLA   | 0.405 | 1.22257E-21 | 0.557 | 3.96621E-43 |
| RSRC1    | 0.501 | 5.75908E-34 | 0.467 | 4.26433E-29 |
| SENP2    | 0.708 | 3.30702E-79 | 0.406 | 7.83144E-22 |
| SGEF     | 0.439 | 1.42469E-25 | 0.712 | 1.4375E-80  |
| SLC25A36 | 0.538 | 7.76435E-40 | 0.420 | 2.71419E-23 |
| SOX2OT   | 0.607 | 4.3003E-53  | 0.797 | 6.2569E-114 |
| STRBP    | 0.427 | 3.25372E-24 | 0.644 | 1.6076E-61  |
| TBCCD1   | 0.644 | 1.99628E-61 | 0.458 | 5.55391E-28 |
| TBL1XR1  | 0.726 | 3.81792E-85 | 0.467 | 3.42099E-29 |
| TMEM20   | 0.415 | 8.64226E-23 | 0.493 | 9.52065E-33 |
| TRA2B    | 0.502 | 3.50901E-34 | 0.443 | 4.48054E-26 |
| TRIM59   | 0.480 | 6.78894E-31 | 0.423 | 9.85771E-24 |
| TSEN15   | 0.443 | 4.26773E-26 | 0.449 | 8.30335E-27 |
| ULBP1    | 0.440 | 9.56135E-26 | 0.401 | 2.7856E-21  |
| VWA5B2   | 0.551 | 4.86855E-42 | 0.525 | 1.23116E-37 |
| WNK2     | 0.414 | 1.03158E-22 | 0.603 | 3.61689E-52 |
| ZNF639   | 0.787 | 1.4867E-109 | 0.419 | 3.40964E-23 |
| ZXDC     | 0.420 | 2.18478E-23 | 0.419 | 3.09197E-23 |

---

Table S2. Comparison of somatic mutation frequencies between SOX2-high and SOX2-low subtypes.

|        |     | SOX-high | SOX-low | Fisher's p value |
|--------|-----|----------|---------|------------------|
| AKT1   | MUT | 1        | 1       | 0.054            |
|        | WT  | 215      | 276     |                  |
| APC    | MUT | 13       | 8       | 0.115            |
|        | WT  | 203      | 269     |                  |
| ATM    | MUT | 5        | 10      | 0.443            |
|        | WT  | 211      | 267     |                  |
| CDH1   | MUT | 4        | 1       | 0.174            |
|        | WT  | 212      | 276     |                  |
| CDKN2A | MUT | 34       | 77      | 1.59E-07         |
|        | MUT | 182      | 200     |                  |
| CSF1R  | WT  | 1        | 0       | 0.438            |
|        | MUT | 215      | 277     |                  |
| EGFR   | WT  | 6        | 13      | 0.348            |
|        | MUT | 210      | 264     |                  |
| ERBB2  | WT  | 6        | 2       | 0.146            |
|        | MUT | 210      | 275     |                  |
| ERBB4  | MUT | 10       | 11      | 0.823            |
|        | WT  | 206      | 266     |                  |
| FBXW7  | MUT | 14       | 18      | 1                |
|        | WT  | 202      | 259     |                  |
| FGFR2  | MUT | 0        | 3       | 0.26             |
|        | WT  | 216      | 274     |                  |
| FGFR3  | MUT | 7        | 5       | 3.11E-06         |
|        | MUT | 209      | 272     |                  |
| FLT3   | WT  | 3        | 3       | 0.115            |
|        | MUT | 212      | 274     |                  |
| GNA11  | WT  | 0        | 3       | 0.26             |
|        | MUT | 216      | 274     |                  |
| HRAS   | WT  | 1        | 26      | 3.11E-06         |
|        | MUT | 215      | 251     |                  |
| IDH1   | MUT | 1        | 3       | 0.635            |
|        | WT  | 215      | 274     |                  |
| JAK3   | MUT | 2        | 3       | 1                |
|        | WT  | 214      | 274     |                  |

|        |     |     |     |          |
|--------|-----|-----|-----|----------|
| KIT    | MUT | 2   | 3   | 1        |
|        | WT  | 214 | 274 |          |
| NOTCH1 | MUT | 16  | 69  | 1.59E-07 |
|        | MUT | 200 | 208 |          |
| NRAS   | WT  | 1   | 0   | 0.438    |
|        | MUT | 215 | 277 |          |
| PIK3CA | WT  | 47  | 43  | 0.079    |
|        | MUT | 169 | 234 |          |
| PTEN   | WT  | 10  | 4   | 0.053    |
|        | MUT | 206 | 273 |          |
| RB1    | MUT | 12  | 6   | 0.054    |
|        | WT  | 204 | 271 |          |
| RET    | MUT | 8   | 4   | 0.142    |
|        | WT  | 208 | 273 |          |
| SMAD4  | MUT | 5   | 7   | 1        |
|        | WT  | 211 | 270 |          |
| SMO    | MUT | 1   | 0   | 0.438    |
|        | MUT | 215 | 277 |          |
| SRC    | WT  | 0   | 0   | 1        |
|        | MUT | 216 | 277 |          |
| STK11  | WT  | 2   | 3   | 1        |
|        | MUT | 214 | 274 |          |
| TP53   | WT  | 141 | 210 | 0.012    |
|        | MUT | 75  | 67  |          |
| VHL    | MUT | 0   | 0   | 0.438    |
|        | WT  | 216 | 277 |          |

---
